# Supplementary material
Source: PubMed Central journal article supplement (PMC1459376)

**A**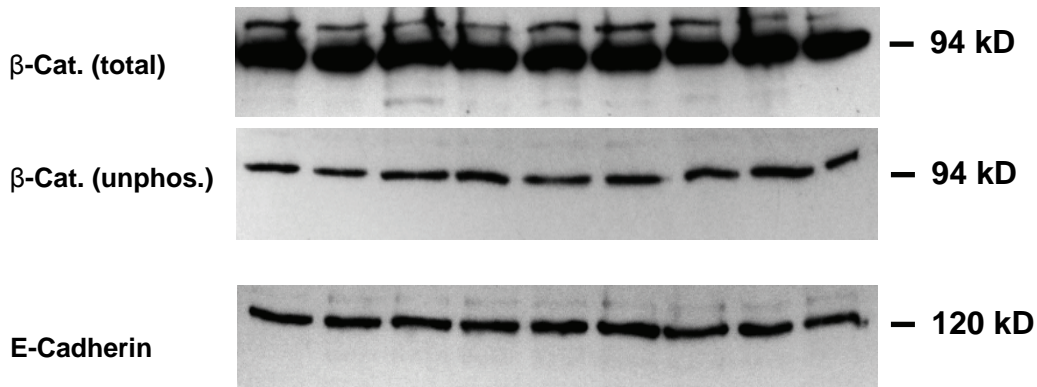

|                      |   |   |   |    |    |   |   |    |    |
|----------------------|---|---|---|----|----|---|---|----|----|
| <b>Coculture (h)</b> | 0 | 1 | 4 | 16 | 40 | 1 | 4 | 16 | 40 |
| <b>DKK-1</b>         |   |   |   |    |    | + | + | +  | +  |

Supplement: pnas_0509703103_1.pdf [file pnas_0509703103_1.pdf]

**B****a**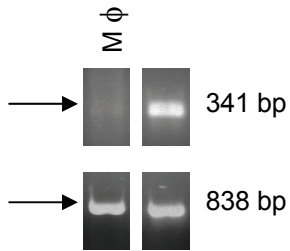**b**

|               | Cycle threshold (Ct) |                  |
|---------------|----------------------|------------------|
|               | Ct Mφ                | Ct Mφ + MCF-7    |
| $\beta_2$ -mg | 25,79 $\pm$ 0,21     | 23,59 $\pm$ 0,04 |
| Wnt 5a        | n.d. (>50)           | 35,12 $\pm$ 0,23 |

Supplement: pnas_0509703103_2.pdf [file pnas_0509703103_2.pdf]

C

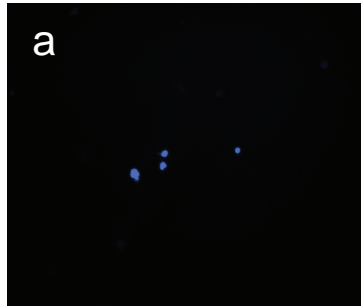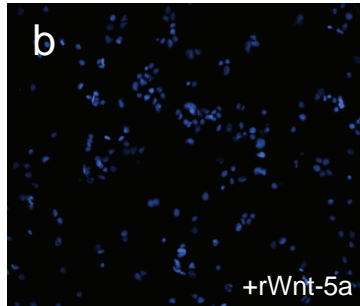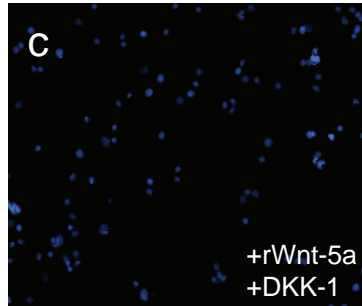

Supplement: pnas_0509703103_3.pdf [file pnas_0509703103_3.pdf]

**D**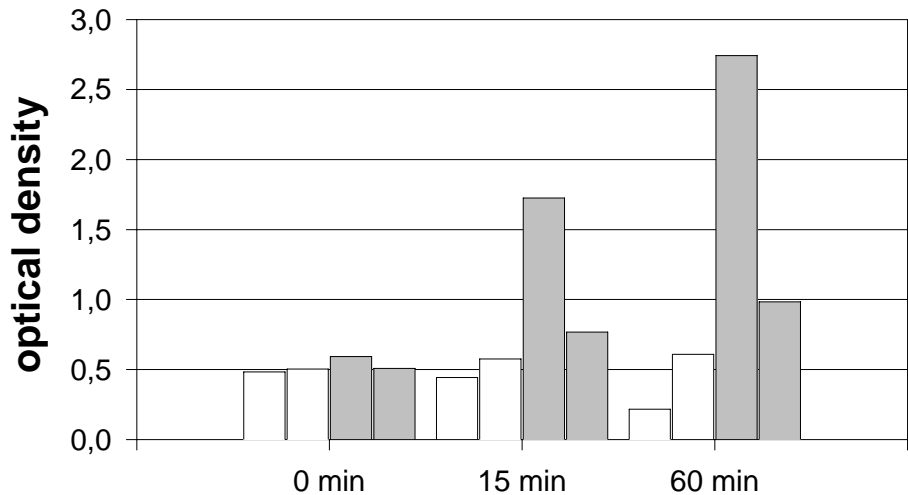

|                |  |   |   |   |
|----------------|--|---|---|---|
| <b>rWnt-5a</b> |  |   | + | + |
| <b>DKK-1</b>   |  | + |   | + |

|  |  |   |   |   |
|--|--|---|---|---|
|  |  |   | + | + |
|  |  | + |   | + |

|  |  |   |   |   |
|--|--|---|---|---|
|  |  |   | + | + |
|  |  | + |   | + |

Supplement: pnas_0509703103_4.pdf [file pnas_0509703103_4.pdf]

**m**

**Extinction**

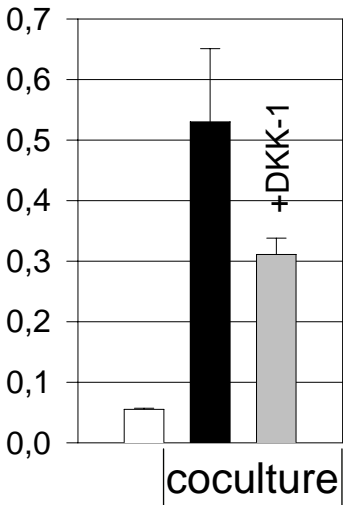

Supplement: pnas_0509703103_5.pdf [file pnas_0509703103_5.pdf]

**F**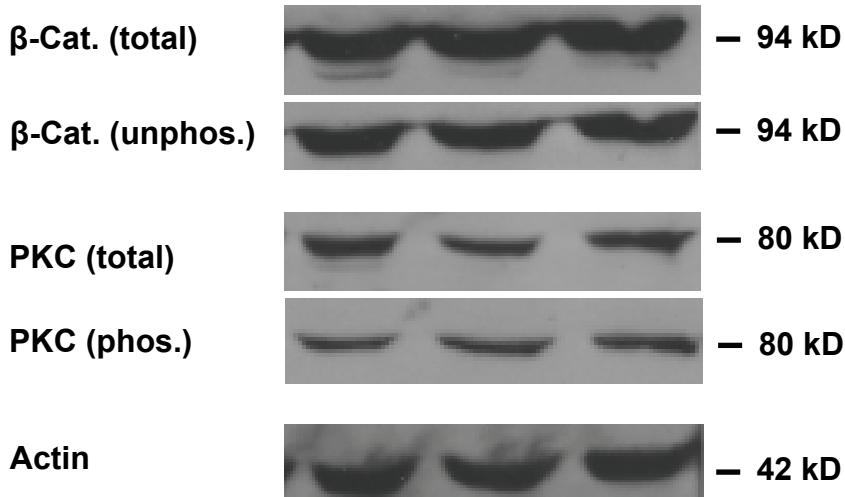

|                       |          |          |           |
|-----------------------|----------|----------|-----------|
| <b>rec.Wnt5a</b>      | <b>-</b> | <b>+</b> | <b>+</b>  |
| <b>Incubation (h)</b> |          | <b>1</b> | <b>16</b> |

Supplement: pnas_0509703103_6.pdf [file pnas_0509703103_6.pdf]

**G**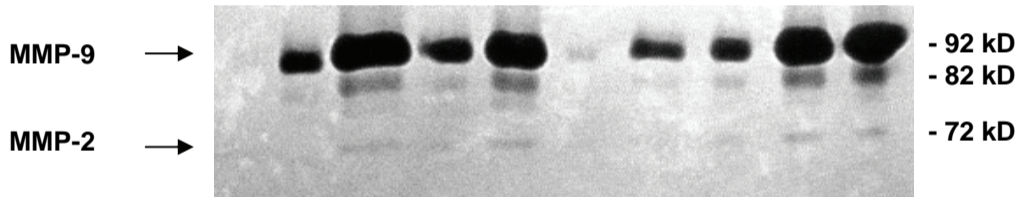

|                      |   |   |   |    |    |   |   |   |    |    |
|----------------------|---|---|---|----|----|---|---|---|----|----|
| <b>Coculture (h)</b> | 0 | 1 | 4 | 16 | 40 | 0 | 1 | 4 | 16 | 40 |
| <b>DKK-1</b>         |   |   |   |    |    | + | + | + | +  | +  |

Supplement: pnas_0509703103_7.pdf [file pnas_0509703103_7.pdf]

**Invasion rate %**

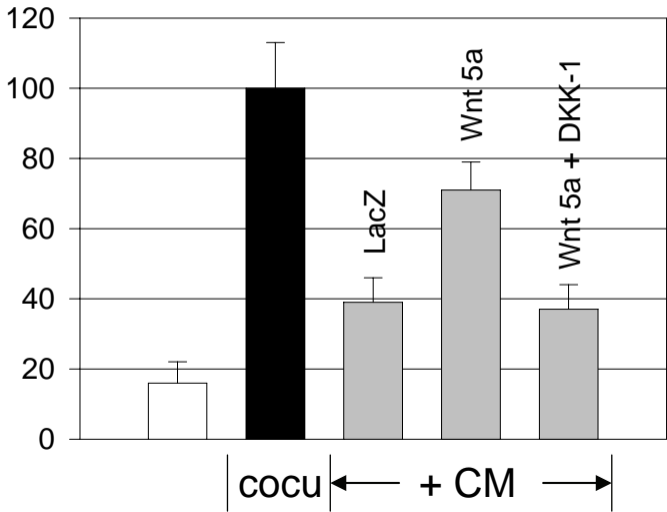

Supplement: pnas_0509703103_8.pdf [file pnas_0509703103_8.pdf]

H

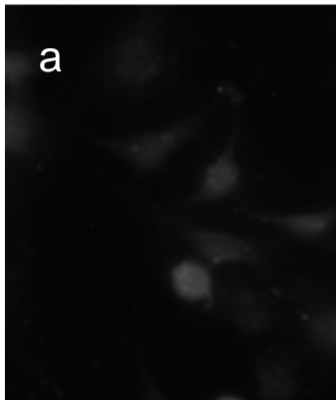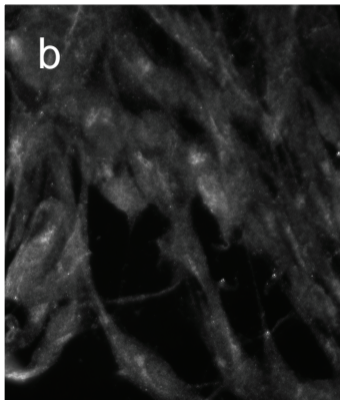

Supplement: pnas_0509703103_9.pdf [file pnas_0509703103_9.pdf]
